# Supplementary material for: Adaptation of potato cultivars to phosphorus variability and enhancement of phosphorus efficiency by Bacillus subtilis
Source: PubMed Central journal article supplement (PMC11636052; doi:10.1186/s12870-024-05868-x), 2024-12-12
Supplement: 12870_2024_5868_MOESM1_ESM.pdf [file 12870_2024_5868_MOESM1_ESM.pdf]

**Additional files****Additional file 1.** Concentration of nutrients applied in the hydroponic system

| Nutrient | Concentration (mg L <sup>-1</sup> ) | Nutrient sources                                                                                                                                                                           |
|----------|-------------------------------------|--------------------------------------------------------------------------------------------------------------------------------------------------------------------------------------------|
| P        | 0 - 30                              | KH <sub>2</sub> PO <sub>4</sub>                                                                                                                                                            |
| N        | 56.04                               | NH <sub>4</sub> NO <sub>3</sub> , Ca(NO <sub>3</sub> ) <sub>2</sub> * 4H <sub>2</sub> O                                                                                                    |
| K        | 104.25                              | K <sub>2</sub> SO <sub>4</sub>                                                                                                                                                             |
| Ca       | 69.05                               | Ca(NO <sub>3</sub> ) <sub>2</sub> * 4H <sub>2</sub> O, CaCl <sub>2</sub> * 2H <sub>2</sub> O                                                                                               |
| S        | 45.01                               | K <sub>2</sub> SO <sub>4</sub> , MgSO <sub>4</sub> * 7H <sub>2</sub> O, CuSO <sub>4</sub> * 5H <sub>2</sub> O, ZnSO <sub>4</sub> * 7H <sub>2</sub> O, MnSO <sub>4</sub> * H <sub>2</sub> O |
| Mg       | 1.62                                | MgSO <sub>4</sub> * 7H <sub>2</sub> O                                                                                                                                                      |
| Cu       | 0.02                                | CuSO <sub>4</sub> * 5H <sub>2</sub> O                                                                                                                                                      |
| EDTA-Fe  | 5.58                                | C <sub>10</sub> H <sub>12</sub> FeN <sub>2</sub> NaO <sub>8</sub> * 3H <sub>2</sub> O                                                                                                      |
| Zn       | 0.09                                | ZnSO <sub>4</sub> * 7H <sub>2</sub> O                                                                                                                                                      |
| B        | 0.14                                | H <sub>3</sub> BO <sub>3</sub>                                                                                                                                                             |
| Mo       | 0.13                                | H <sub>24</sub> Mo <sub>7</sub> N <sub>6</sub> O <sub>24</sub> * 4H <sub>2</sub> O                                                                                                         |
| Mn       | 0.07                                | MnSO <sub>4</sub> * H <sub>2</sub> O                                                                                                                                                       |
| Na       | 2.32                                | C <sub>10</sub> H <sub>12</sub> FeN <sub>2</sub> NaO <sub>8</sub> * 3H <sub>2</sub> O                                                                                                      |
| Cl       | 2.83                                | CaCl <sub>2</sub> * 2H <sub>2</sub> O                                                                                                                                                      |

**Additional file 2.** Acquisition parameters for phytohormone analysis.

| Compound                | RT [min] | Polarity | Parent Ion [m/z] | Fragmentor V | Collision Energy V | Product Ion [m/z] |
|-------------------------|----------|----------|------------------|--------------|--------------------|-------------------|
| <i>Trans</i> -zeatin    | 1.93     | +        | 220.1            | 100          | 15                 | 136.1             |
|                         |          |          |                  |              | 9                  | 202.1             |
|                         |          |          |                  |              | 22                 | 148.1             |
| <i>Trans</i> -zeatin-d5 | 1.92     | +        | 225.1            | 105          | 16                 | 137.1             |
|                         |          |          |                  |              | 10                 | 207.2             |
| Indoleacetic acid (IAA) | 3.88     | +        | 176.1            | 84           | 14                 | 130               |
|                         |          |          |                  |              | 38                 | 103.1             |
|                         |          |          |                  |              | 40                 | 77.2              |
| Indoleacetic acid-d4    | 3.87     | +        | 180.1            | 84           | 15                 | 133.2             |
|                         |          |          |                  |              | 38                 | 106.1             |
|                         |          |          |                  |              | 45                 | 79.2              |
| Abscisic acid (ABA)     | 4.68     | -        | 263.1            | 85           | 4                  | 153.1             |
|                         |          |          |                  |              | 5                  | 219.1             |
|                         |          |          |                  |              | 12                 | 204.1             |
| Abscisic acid-d6        | 4.67     | -        | 269.1            | 88           | 4                  | 159.1             |
|                         |          |          |                  |              | 8                  | 225.1             |
| Jasmonic acid (JA)      | 5.20     | +        | 211.2            | 85           | 8                  | 133.1             |
|                         |          |          |                  |              | 8                  | 151.1             |
|                         |          |          |                  |              | 5                  | 193               |
| Jasmonic acid-d5        | 5.19     | +        | 216.1            | 85           | 8                  | 135.1             |
|                         |          |          |                  |              | 9                  | 153.2             |
|                         |          |          |                  |              | 7                  | 198.2             |

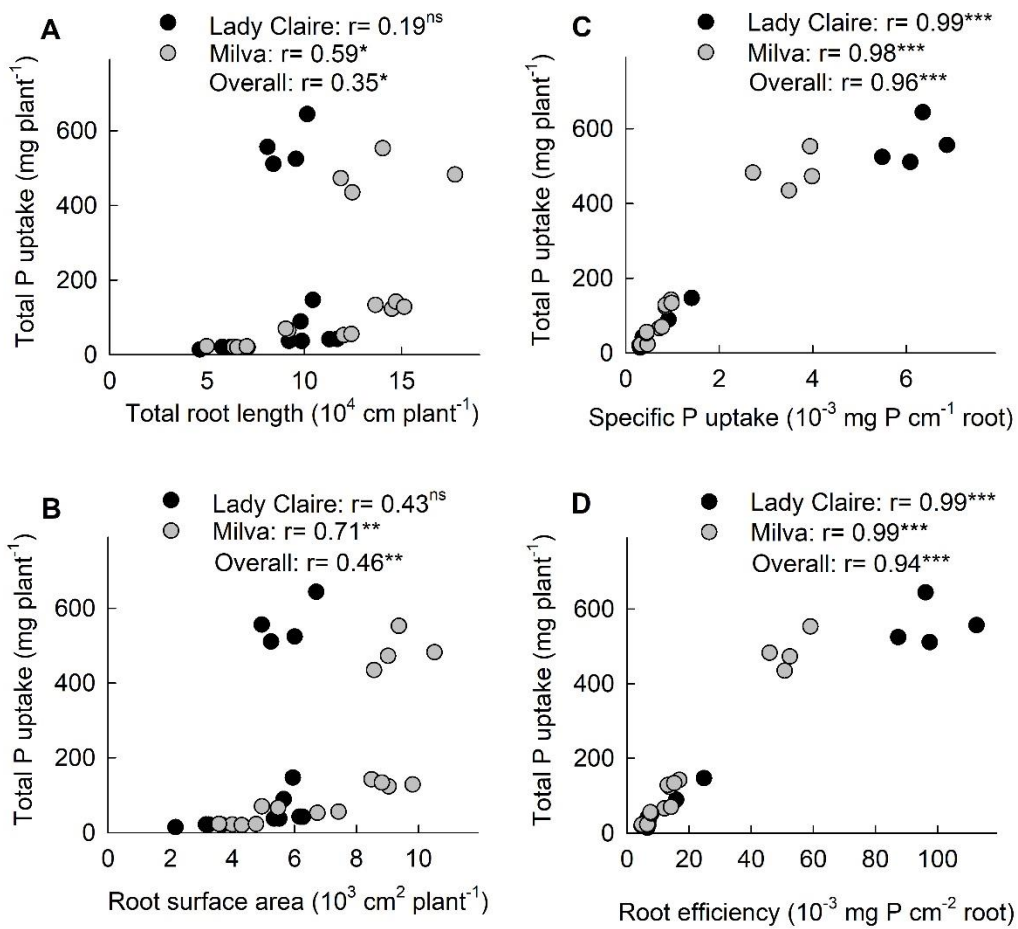

**Additional file 3.** Correlation between root morphological traits and total P uptake. ns, \*, and \*\*\* indicate non-significant and significant differences at  $p < 0.05$  and  $p < 0.001$ , respectively, by Pearson correlation.

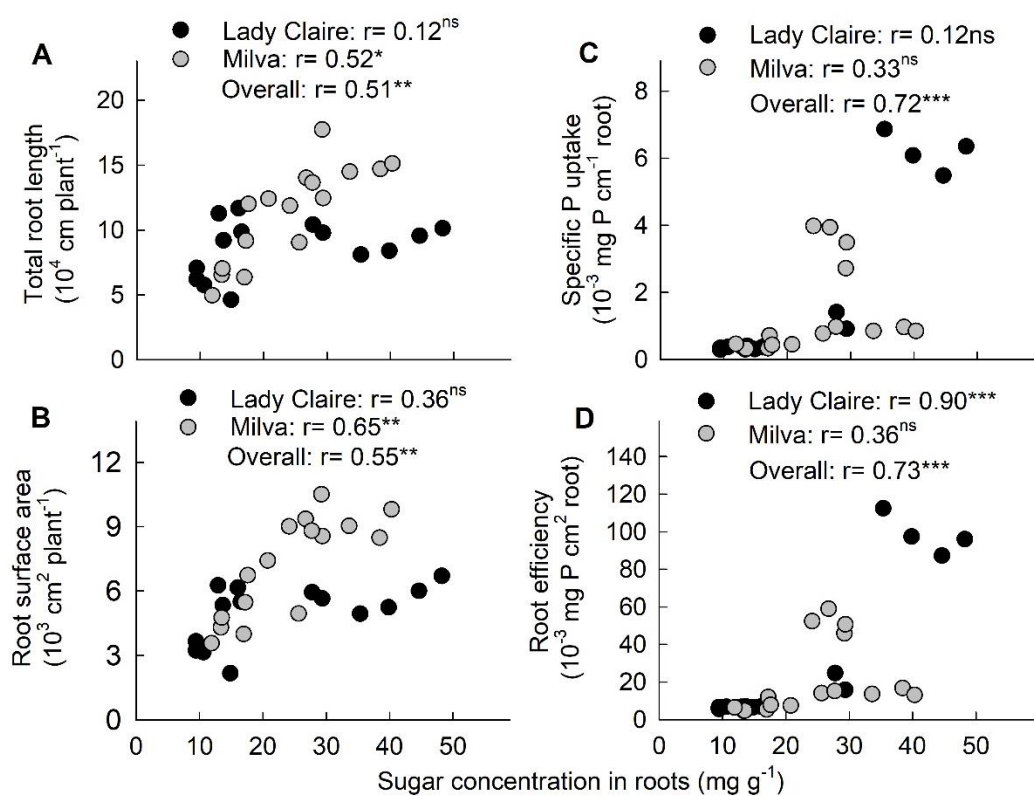

**Additional file 4.** Correlation between root sugar concentration and root morphological traits. ns, \*, and \*\*\* indicate non-significant and significant differences at  $p < 0.05$  and  $p < 0.001$ , respectively, by Pearson correlation.

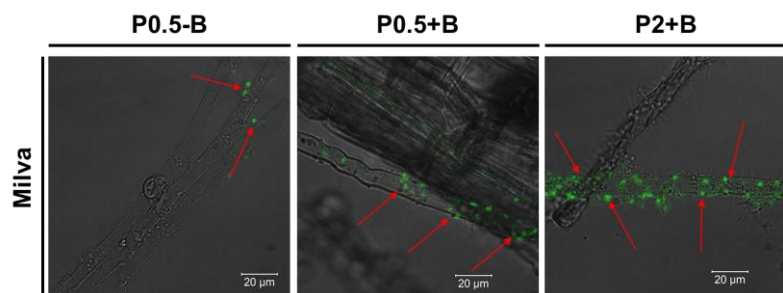

**Additional file 5.** Microscopic images of roots of cultivar Milva with and without *B. subtilis* inoculation using Cellbrite Fix Membrane Stains. Arrows indicate the bacterial colonies attached to the roots. B = *B. subtilis*.

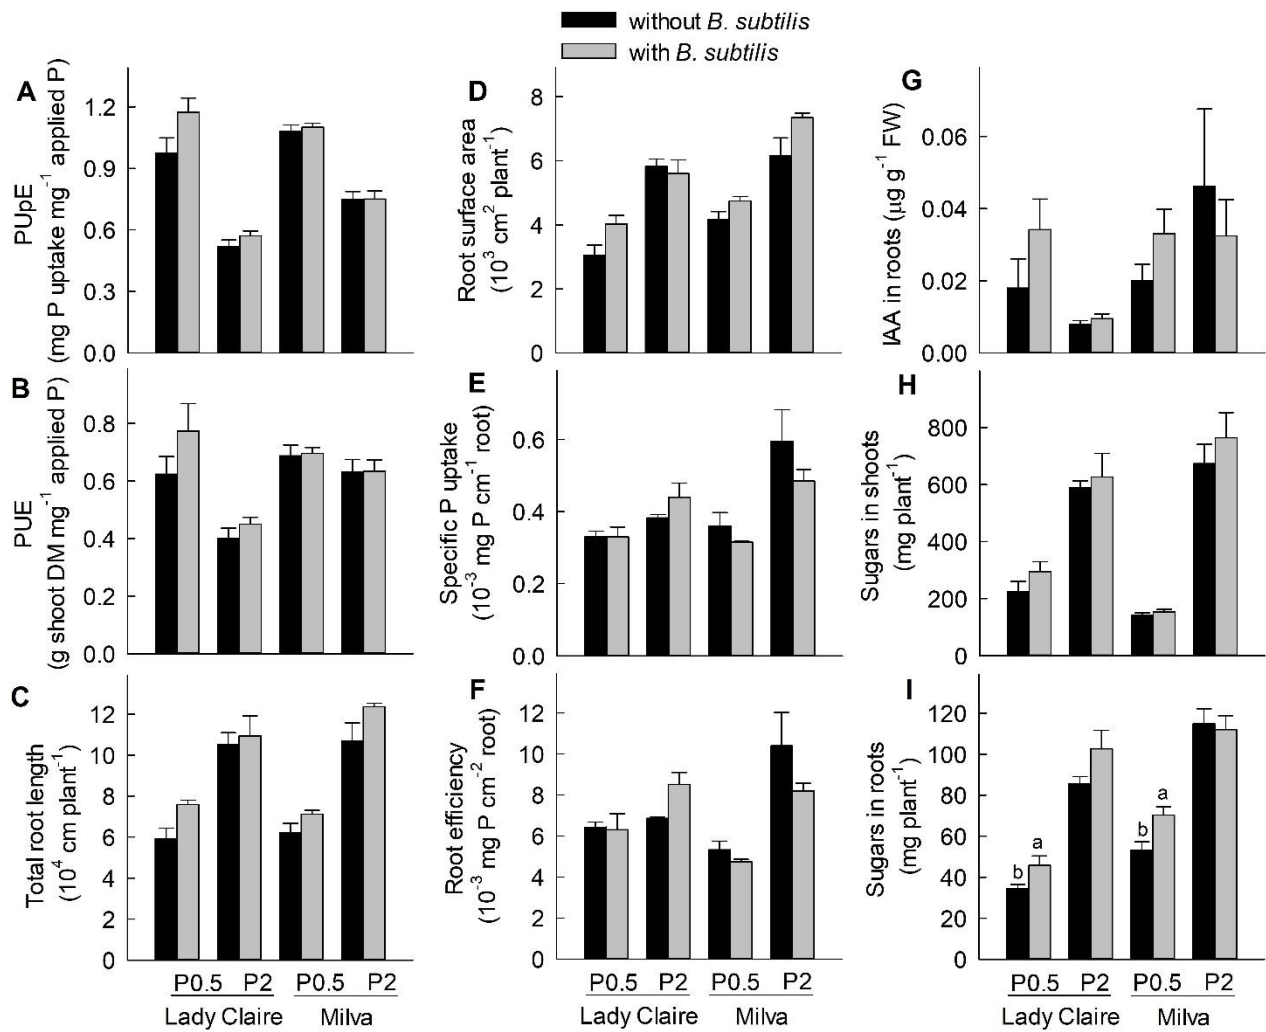

**Additional file 6.** Effect of *B. subtilis* inoculation on (A) PUpE, (B) PUE, (C-F) root traits, (G) root IAA, and (H-I) sugar content in shoots and roots. Mean  $\pm$  SE (n=5) with different lowercase letters are significantly different at the same P level and cultivar. No indication = not significantly different.
